# Supplementary material for: Replacement of the phosphodiester linkage in DNA with sulfamide and 3′-N-sulfamate groups
Source: Royal Society of Chemistry journal article supplement (doi:10.1039/b001586p), 2000-01-01
Supplement: b001586p.doc [file b001586p.doc]

**Electronic Supplementary information.**

**Replacement of the phosphodiester linkage in DNA**

**with sulfamide and 3´–*N*–sulfamate groups**

Kevin J. Fettes, Nigel I. Howard, David T. Hickman, Steven Adah,

Mark R. Player, Paul F. Torrence and Jason Micklefield.*

Experimental details for oligonucleotide synthesis and duplex denaturation experiments

Oligonucleotides were synthesised automatically on an ABI 392 synthesiser. Coupling wait times were extended to 60 sec. for monomer phosphoramidites and 15 min. for dimer phosphoramidites. Deprotection was carried using concentrated aqueous ammonia and ethanol (3:1 v/v) for 4 hours at 55 ˚C. Oligonucleotides were purified using a Hamilton polystyrene reverse phase PRP–1 HPLC column (250 x 21.5 mm) with the following elution protocol: solvent A was 10 mM tetrabutylammonium phosphate (TBAP), pH 7.5, in water; solvent B was 10 mM TBAP, pH 7.5, in MeCN/H2O (8:2, v/v); elution with a gradient of 5–95% of solvent B in A in 40 min. at a flow rate of 5 cm3/min.

Duplex denaturation experiments were performed using a Hewlett-Packard (HP) 845A Diode Array Spectrophotometer with Peltier heating block, HP 89090A temperature control unit and a PC running UV Chemstation. The absorption at 260 nm *vs*. temperature profiles for equimolar mixtures of complementary oligonucleotides (3M strand concentrations), were recorded in 10 mM phosphate (pH 7.0), 0.1 mM EDTA with a total sodium ion concentration of 0.02, 0.1 or 1.0 M, supplemented by the addition of sodium chloride. The heating rate was 1.0 ˚C / min. and the *T*m was determined from the 1st derivative curve using HP UV Chemstation software.
